# Supplementary material for: Fabricating BiVO4/FeOOH/ZnFe-LDH hierarchical core–shell nanorod arrays for visible-light-driven photoelectrochemical water oxidation
Source: Royal Society of Chemistry journal article supplement (doi:10.1039/d2qi01165d), 2022-01-01
Supplement: d2qi01165d1.pdf [file d2qi01165d1.pdf]

Supporting information

For

**Fabricating BiVO<sub>4</sub>/FeOOH/ZnFe-LDH hierarchical core-shell nanorod arrays for visible-light-driven photoelectrochemical water oxidation**

**Changhai Liu<sup>a,c,\*</sup>, Yue Zhang<sup>a</sup>, Ge Yin<sup>a</sup>, Tiantian Shi<sup>a</sup>, Yue Zhang<sup>a</sup>, Zhidong Chen<sup>b,\*</sup>**

<sup>a</sup> School of Materials Science and Engineering, Jiangsu Key Laboratory of Materials Surface Science and Technology, Jiangsu Collaborative Innovation Center of Photovoltaic Science and Engineering, Changzhou University, Changzhou, 213164, Jiangsu, China.

<sup>b</sup> School of Petrochemical Engineering, Changzhou University, Changzhou, 213164, Jiangsu, China.

<sup>c</sup> Institute of Functional Nano & Soft Materials (FUNSOM), Jiangsu Key Laboratory for Carbon-Based Functional Materials & Devices, Soochow University, 199 Ren'ai Road, Suzhou, 215123, Jiangsu, PR China.

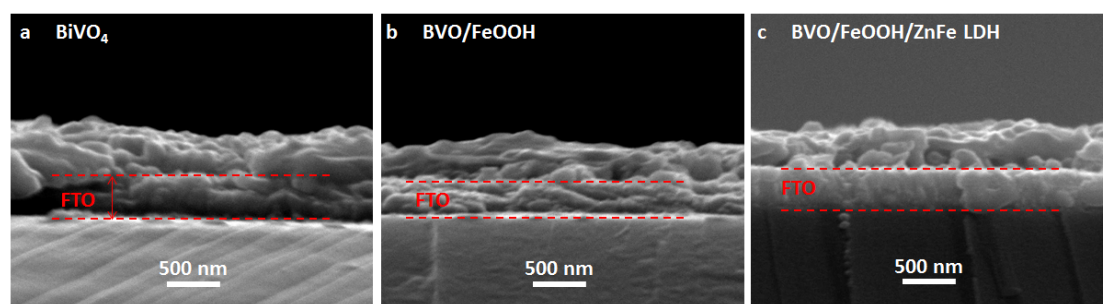

Fig. S1 The cross-section SEM images of (a) BiVO<sub>4</sub>, (b) BVO/FeOOH, and (c) BVO/FeOOH/ZnFe LDH

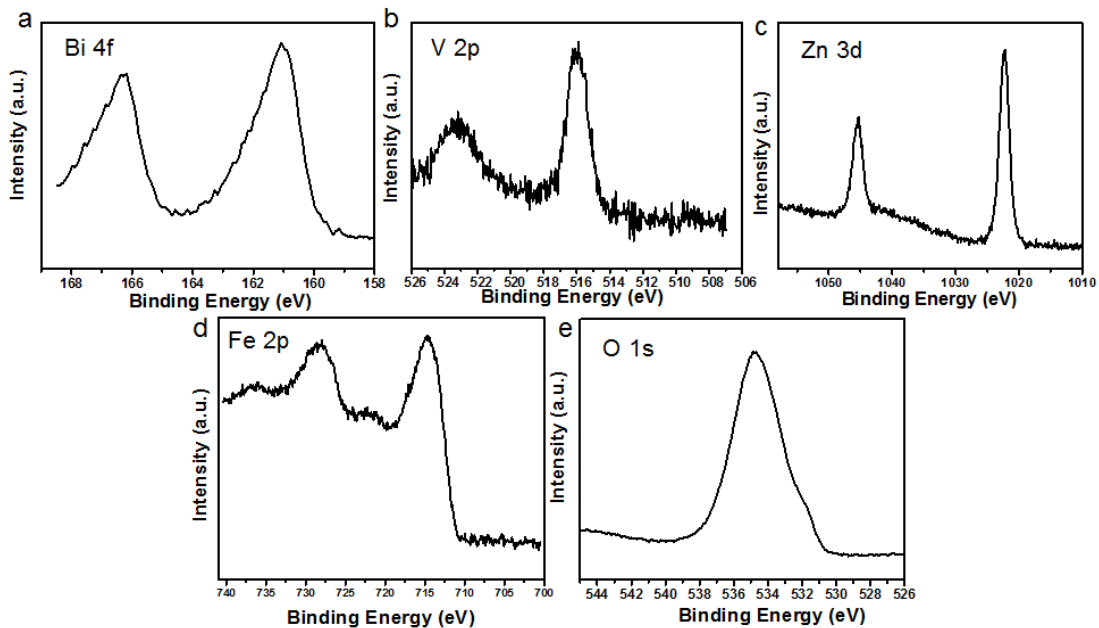

Fig. S2 XPS results of BVO/FeOOH/ZnFe LDH.

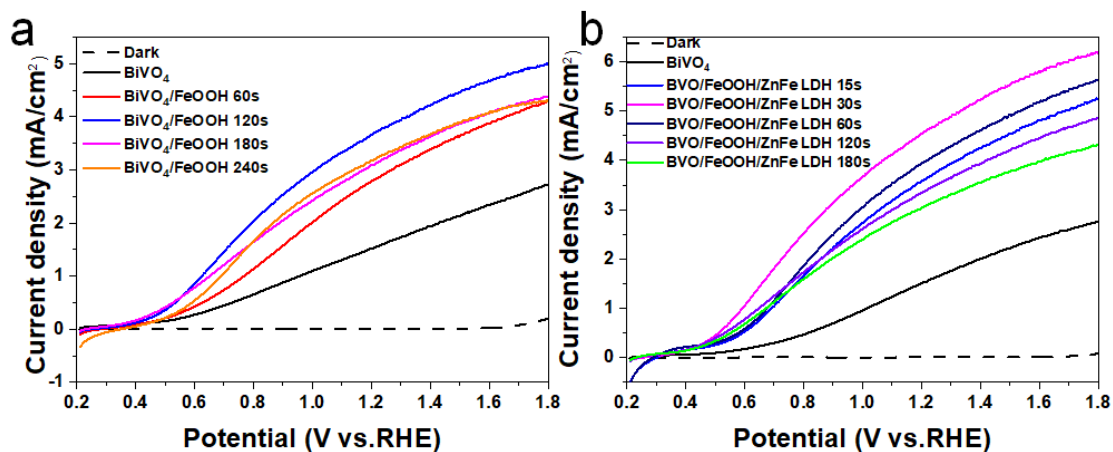

Fig. S3, The LSV of photoanodes from different deposition time for (a) BVO/FeOOH and (b) BVO/FeOOH/ZnFe LDH.

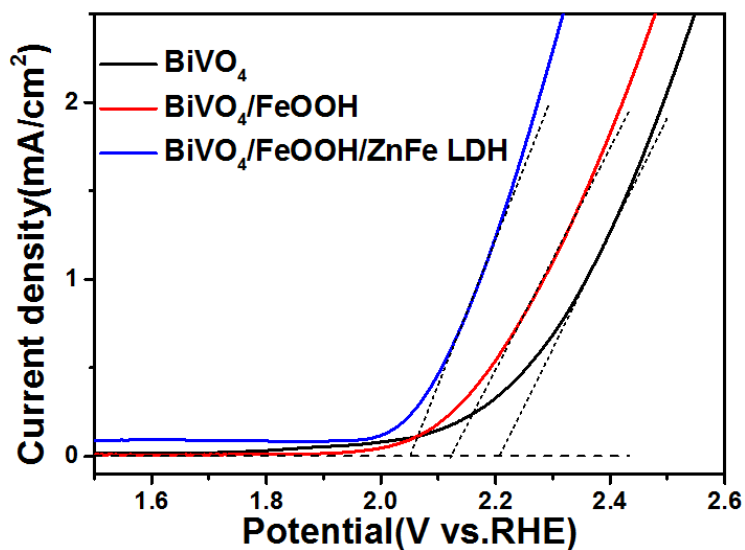

Fig. S4 LSV curves of BiVO<sub>4</sub>, BVO/FeOOH, and BVO/FeOOH/ZnFe LDH samples measured in the dark.

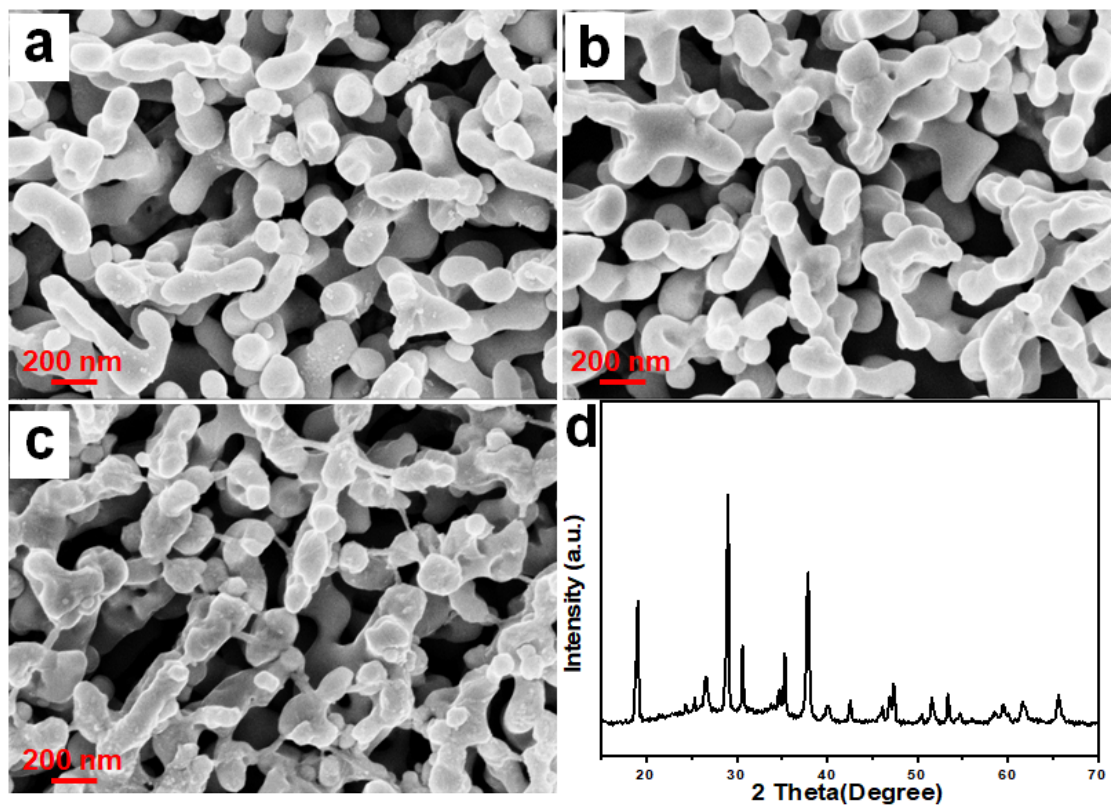

Fig.S5 SEM images of (a) pristine BiVO<sub>4</sub>, (b) BVO/FeOOH, and (c) BVO/FeOOH/ZnFe LDH after long-term i-t testing. (d) XRD pattern of BVO/FeOOH/ZnFe LDH after long-term i-t testing.

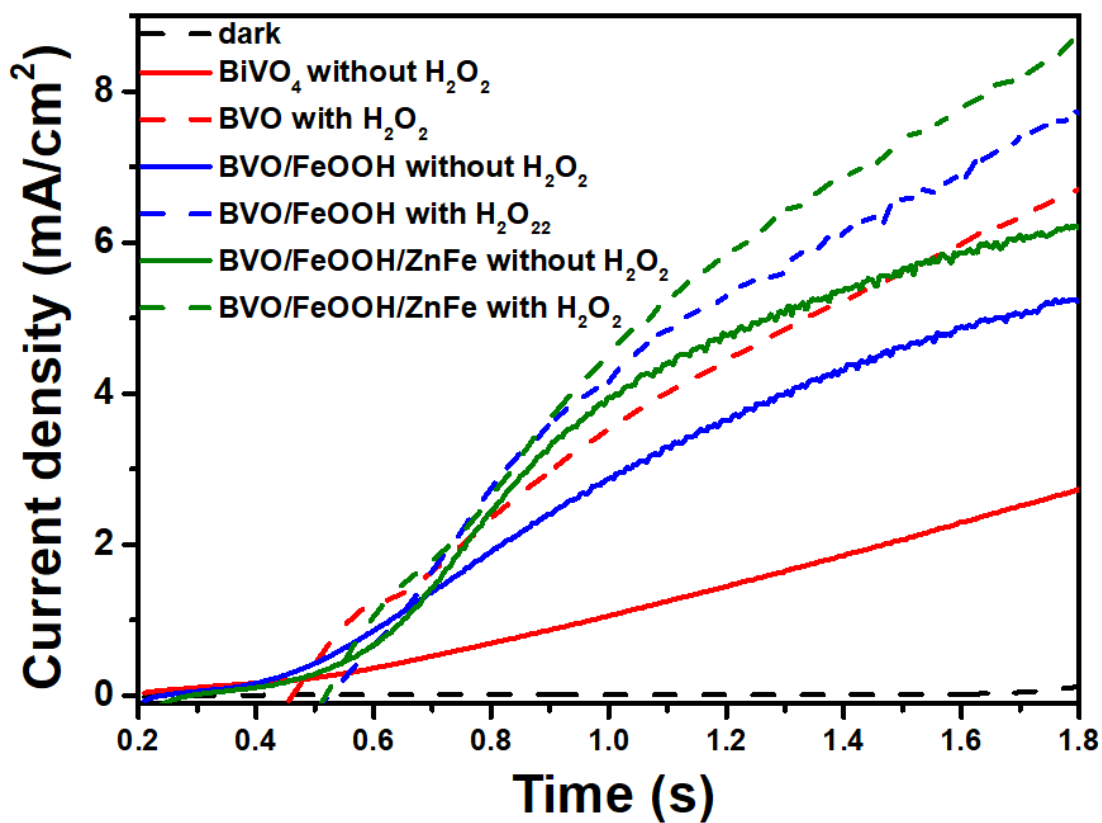

Fig.S6 The LSV results for  $\text{BiVO}_4$ , BVO/FeOOH, and BVO/FeOOH/ZnFe LDH obtained with/without  $\text{H}_2\text{O}_2$  in electrolyte.

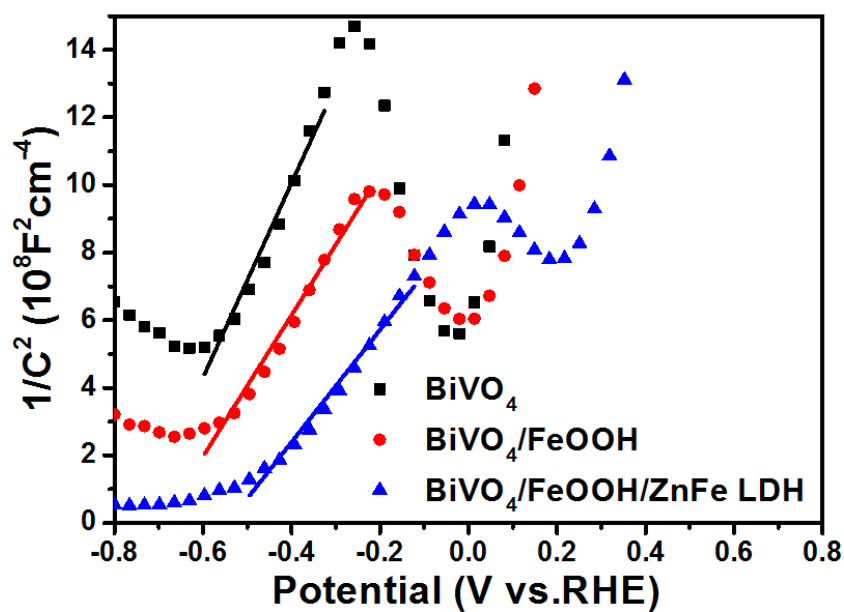

Fig. S7 Mott-Schottky results of pristine  $\text{BiVO}_4$ , BVO/FeOOH, and BVO/FeOOH/ZnFe LDH measured in dark.

Table S1 EIS fitting parameters of BiVO<sub>4</sub>, BVO/FeOOH, and BVO/FeOOH/ZnFe LDH samples.

|                    | R <sub>S</sub> (Ω) | C (×10 <sup>-5</sup> ) | n      | R <sub>CT</sub> (Ω) |
|--------------------|--------------------|------------------------|--------|---------------------|
| BiVO <sub>4</sub>  | 60.33              | 14.90                  | 0.8027 | 411.8               |
| BVO/FeOOH          | 54.29              | 14.20                  | 0.8187 | 331.5               |
| BVO/FeOOH/ZnFe LDH | 52.82              | 16.94                  | 0.8176 | 308.5               |

Table S2 The comparison of PEC performance

| Photoanode                          | Electrolyte                                       | Current density at 1.23 V vs. RHE (mA cm <sup>-2</sup> ) | References                                  |
|-------------------------------------|---------------------------------------------------|----------------------------------------------------------|---------------------------------------------|
| <i>BVO/FeOOH/ZnFe LDH</i>           | <i>1 M Na<sub>2</sub>SO<sub>4</sub></i>           | <i>4.92</i>                                              | <i>This work</i>                            |
| Pt-BiVO <sub>4</sub>                | 1.0 M KBi                                         | 4.2                                                      | Adv. Energy Mater. 2021, 2102384            |
| BiVO <sub>4</sub> /Co-Sil           | 0.5M K <sub>2</sub> B <sub>4</sub> O <sub>7</sub> | 5.0                                                      | Appl. Catal. B: Environ. 2020, 277 119189 3 |
| BiVO <sub>4</sub> (040)/Co SAs-NC   | 0.1 M phosphate buffer solution                   | 0.69                                                     | Chem. Eng. J. 2022, 427, 131011             |
| Pt-BiVO <sub>4</sub>                | 1.0 M KBi                                         | 5.45                                                     | Adv. Energy Mater. 2021, 2102384            |
| Cu <sub>2</sub> S/BiVO <sub>4</sub> | 0.5 M phosphate buffer saline                     | 3.07                                                     | J. Phys. Chem. C 2021, 125, 15890           |
| CoNi-MOFs/BiVO <sub>4</sub>         | 0.5 M Na <sub>2</sub> SO <sub>4</sub>             | 3.2                                                      | Appl. Catal. B: Environ. 2020, 266 118513   |
| NiFeY/BiVO <sub>4</sub>             | 1.0 M KBi                                         | 3.2                                                      | ACS Catal. 2020, 10, 10570                  |
| BiVO <sub>4</sub> /GQDs/Co-Pi       | 0.1M phosphate buffer                             | 5.03                                                     | Chem. Eng. J. 2019, 372, 399                |
